# Supplementary material for: Design and 3D printing of a stainless steel reactor for continuous difluoromethylations using fluoroform
Source: Royal Society of Chemistry journal article supplement (doi:10.1039/c7re00176b), 2017-01-01

## Electronic Supplementary Information

### **Design and 3D Printing of a Stainless Steel Reactor for Continuous Difluoromethylations Using Fluoroform**

Bernhard Gutmann,<sup>a,b</sup> Manuel Köckinger,<sup>a</sup> Gabriel Glotz,<sup>a</sup> Tania Ciaglia,<sup>a</sup> Eyke Slama,<sup>b</sup>  
Matej Zadavec,<sup>b</sup> Stefan Pfanner,<sup>c</sup> Manuel C. Maier<sup>d</sup> Heidrun Gruber-Wölfler,<sup>b,d</sup>  
and C. Oliver Kappe\*<sup>a,b</sup>

<sup>a</sup> Institute of Chemistry, University of Graz, NAWI Graz, Heinrichstrasse 28, 8010 Graz,  
Austria. Email: oliver.kappe@uni-graz.at

<sup>b</sup> Center for Continuous Flow Synthesis and Processing (CC FLOW) Research Center  
Pharmaceutical Engineering GmbH (RCPE), Inffeldgasse 13, Graz, Austria

<sup>c</sup> Anton Paar, Anton-Paar-Straße 20, 8054 Graz, Austria

<sup>d</sup> Institute of Process and Particle Engineering, Graz University of Technology, Inffeldgasse  
13, 8010 Graz, Austria

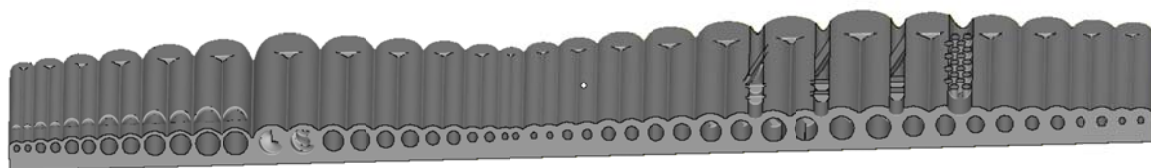

## SCHNITT A-A

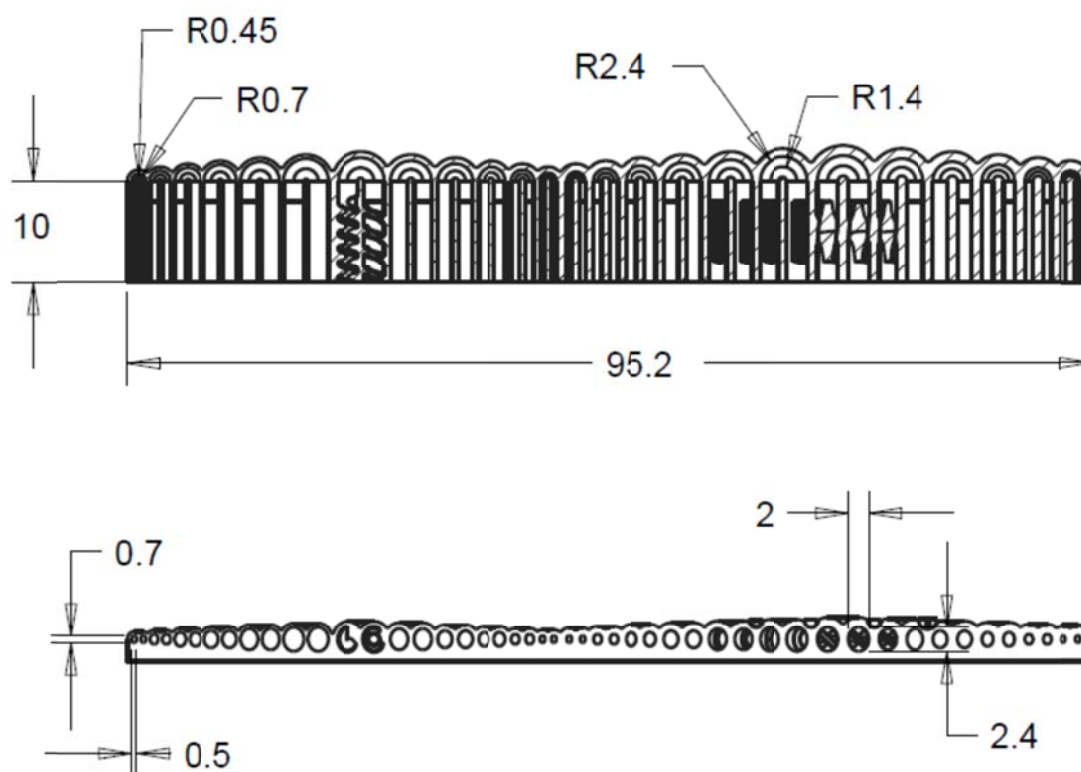

**Fig. S1** 3D CAD drawing for test print (for the print see Fig. S2) .

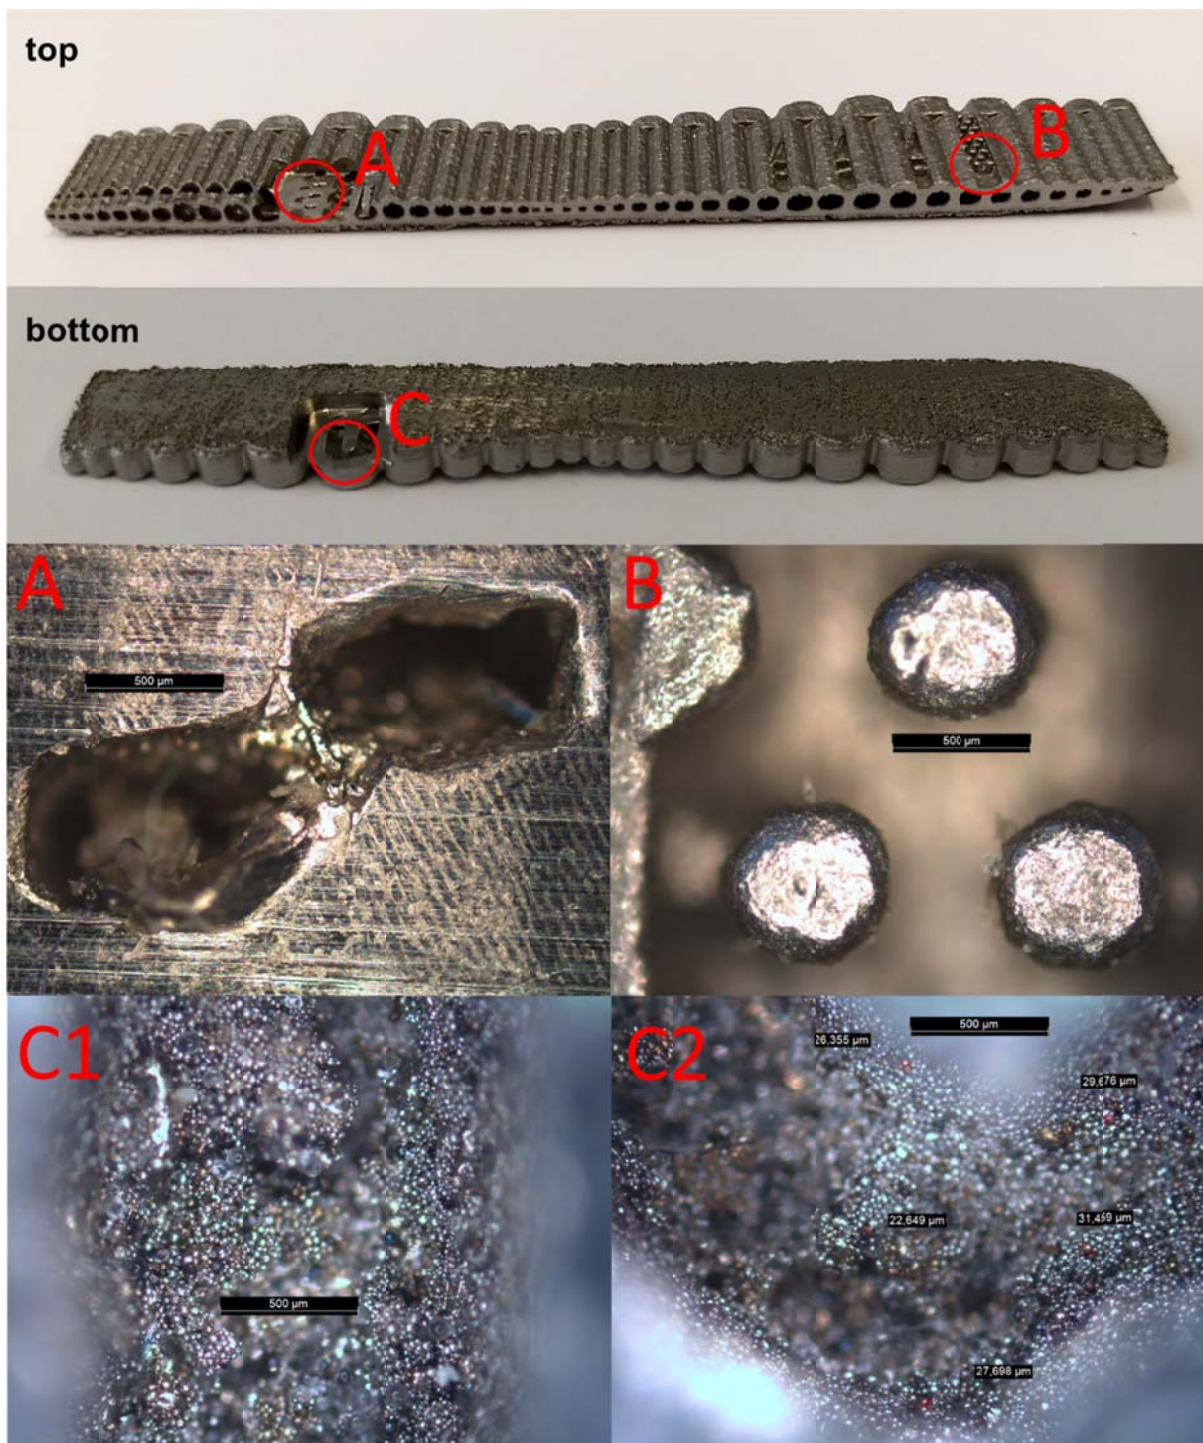

**Fig. S2** Microscope pictures of the test print using 316L stainless steel powder. (C1 and C2) Unmolten particles are fused on the top surface of the channel.

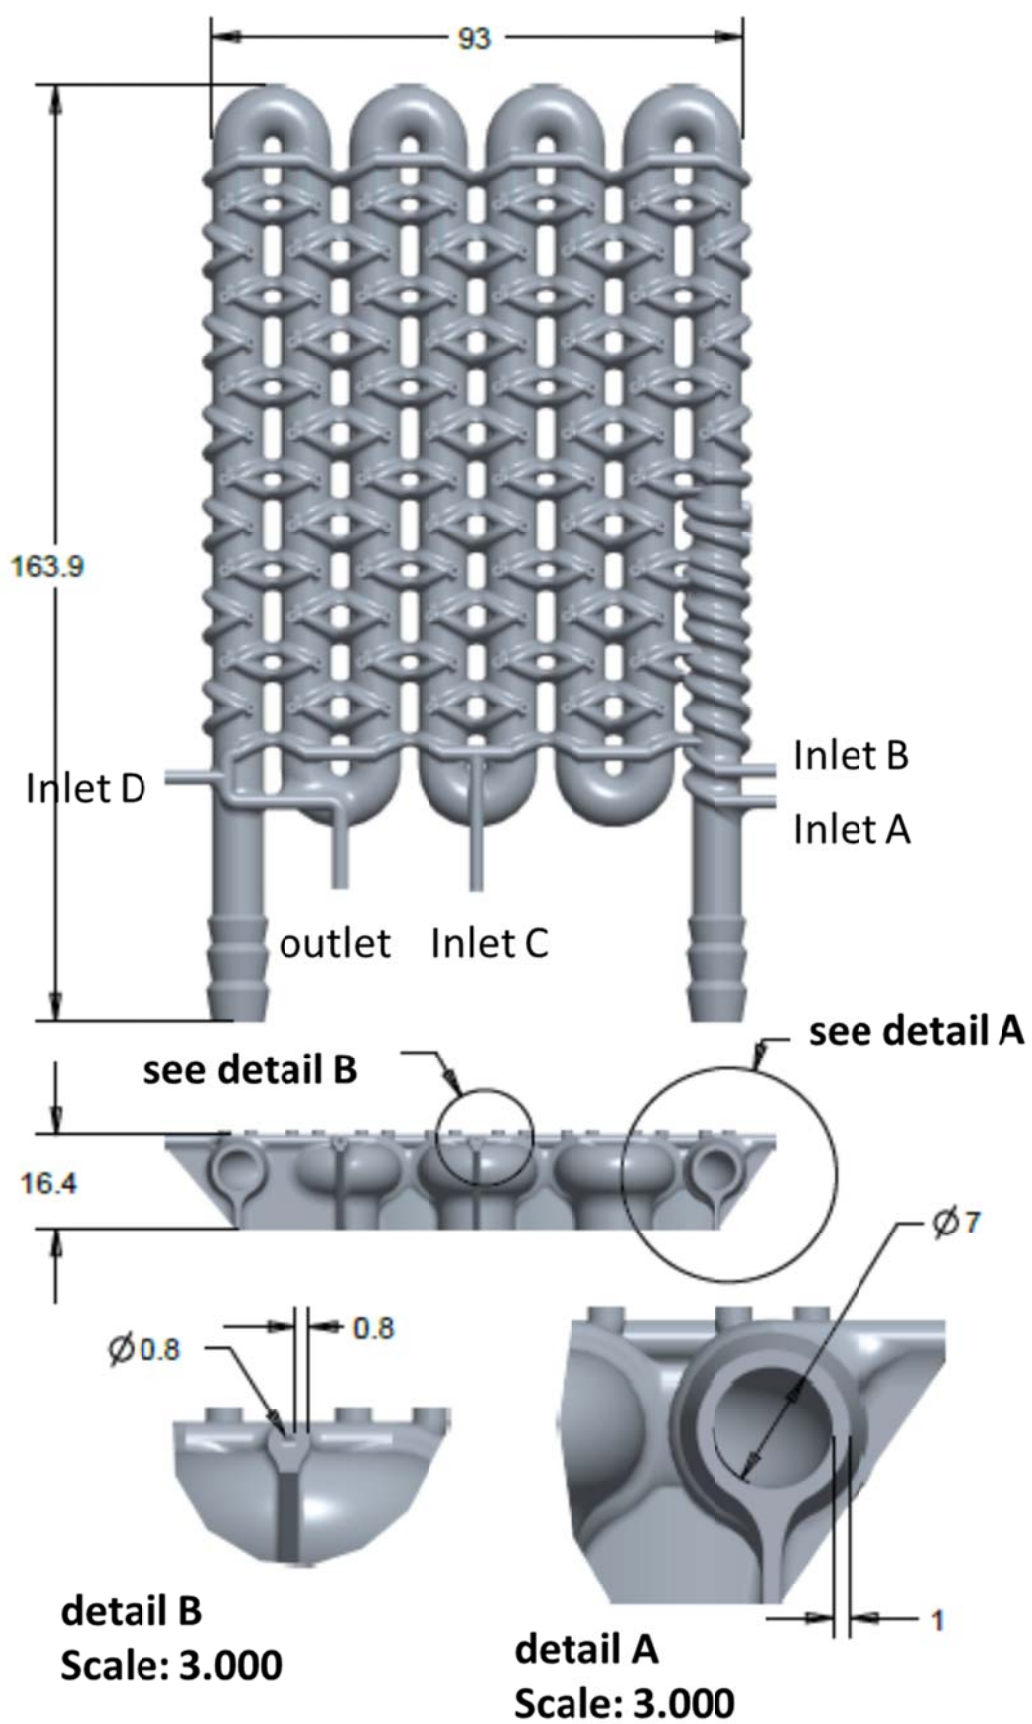

Fig. S3 3D CAD drawing of the continuous flow reactor.

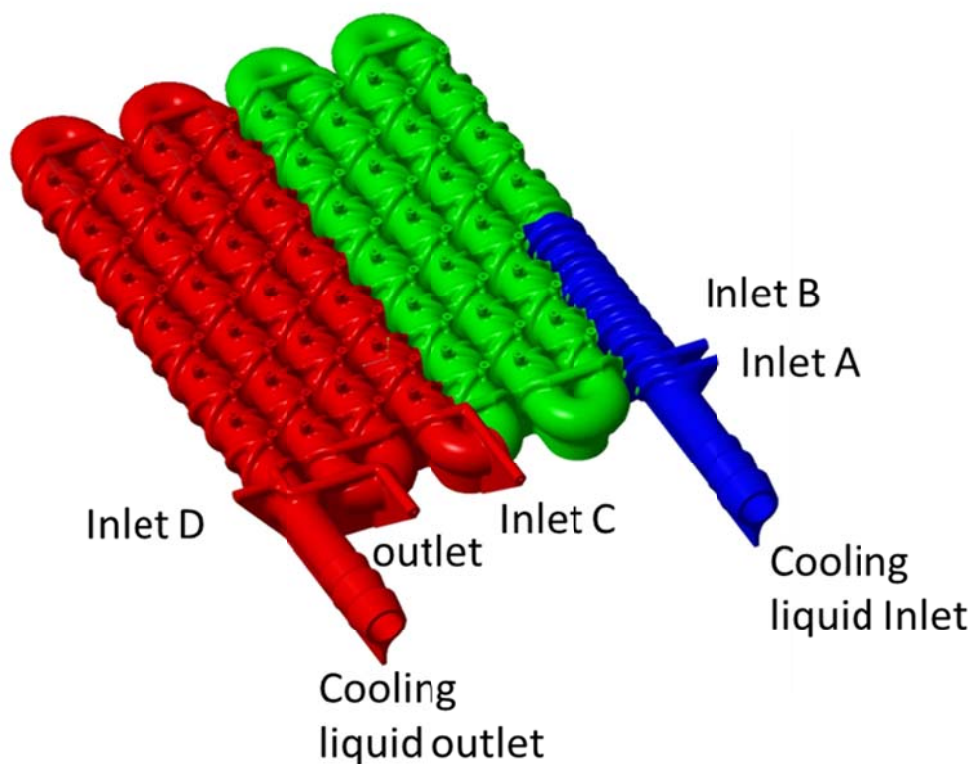

**Fig. S4** 3D CAD drawing of the continuous flow reactor. Blue: Pre-cooling of feed A and B. Green: reaction of feed A and B. Red: Reaction with feed C.

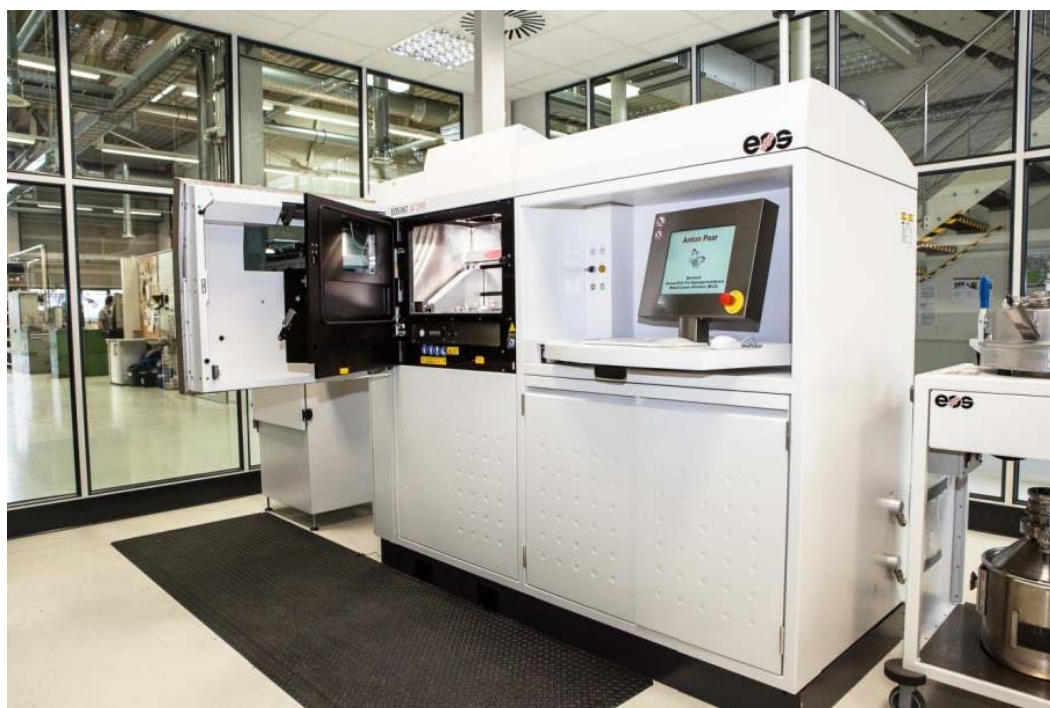

**Fig. S5** EOS DMLS System (for details see: <http://www.shapetec.at/kompetenzen/metall-laser-sintern> (accessed October 20, 2017)).

**Table S1** Particle size distribution characteristics of the 316L stainless steel powder.

| <b>Analysis</b>     |                          |                                    |          |
|---------------------|--------------------------|------------------------------------|----------|
| Particle            | Stainless steel          | Particle refraction index          | 2.757    |
| Dispersion medium   | Dry dispersion           | Refraction index dispersion medium | 1.000    |
| Particle absorption | 3.792                    | Laser Shading                      | 0.89%    |
| Weighted deviation  | 1.00%                    | scattering model                   | Mie      |
| Analysis model      | universal                | Sensitivity                        | extended |
| <b>Results</b>      |                          |                                    |          |
| Concentration       | 0.0046%                  | Width                              | 0.875    |
| Uniformity          | 0.270                    | Uits                               | Volumes  |
| Specific surface    | 18.69 m <sup>2</sup> /Kg | Dv10                               | 28.1 μm  |
| D[3,2]              | 41.1 μm                  | Dv50                               | 43.5 μm  |
| D[4,3]              | 45.7 μm                  | Dv90                               | 66.2 μm  |

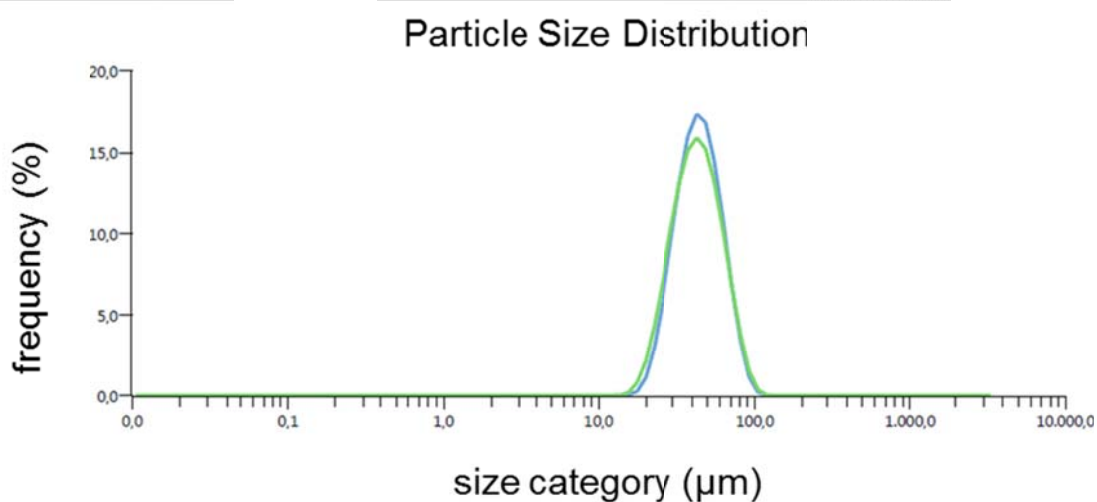**Fig. S6** Particle size distribution characteristics of the 316L stainless steel powder.

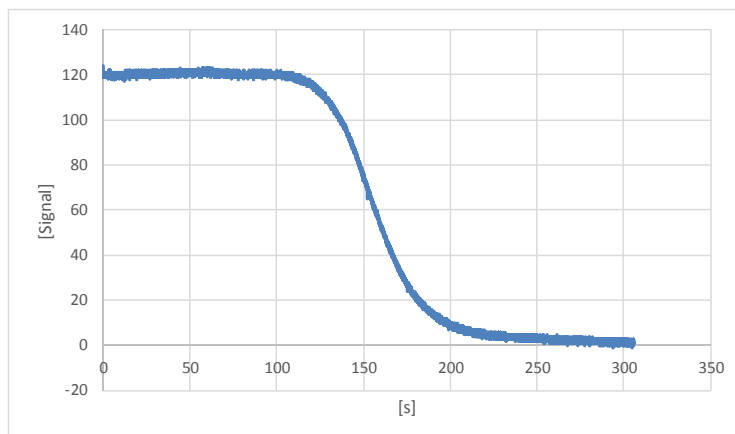

**Fig. S7** Step experiment: To determine the residence time distribution (RTD) in the reactor, a step experiment was performed. A  $10^{-3}$  M aqueous solution of Rose Bengal was pumped through the reactor with a flow rate of 1 mL/min. A fast switch from the Rose Bengal solution to water was carried out by means of a three-way valve, while maintaining a flow rate of 1 mL/min. The concentration of Rose Bengal at the outlet was measured in-line with an in-house developed photomete .

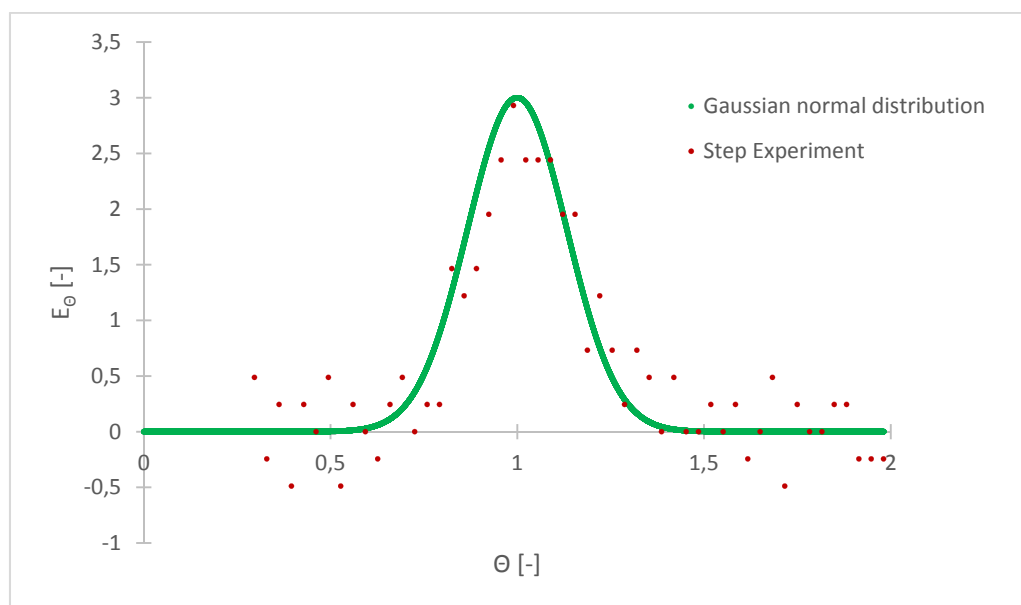

**Fig. S8** Determination of the retention time: Dimensionless exit age distribution  $E_{\theta}$  vs. dimensionless time  $\theta$  (derived from data points presented in Fig. S7). The evaluation of the experiment was carried out according to the dispersion model by Levenspiel [Levenspiel, O., 1999. Chemical Reaction Engineering. Wiley, New York]. Exit age distribution in dimensionless form of the experiment and a fit with a Gaussian normal distribution can be seen. With the experimental data a Bodenstein number for the open-open vessel condition was found to be 31.44 and mean residence time was calculated to be 154.4 s (reactor plus feed lines) for the step experiment. The Bodenstein number and the narrow exit age distribution suggest moderate axial dispersion throughout the reactor, without channeling or unexpected dead volumes.

$^1\text{H-NMR}$  of difluoromethyldiphenylacetonitrile ( $\text{CDCl}_3$ )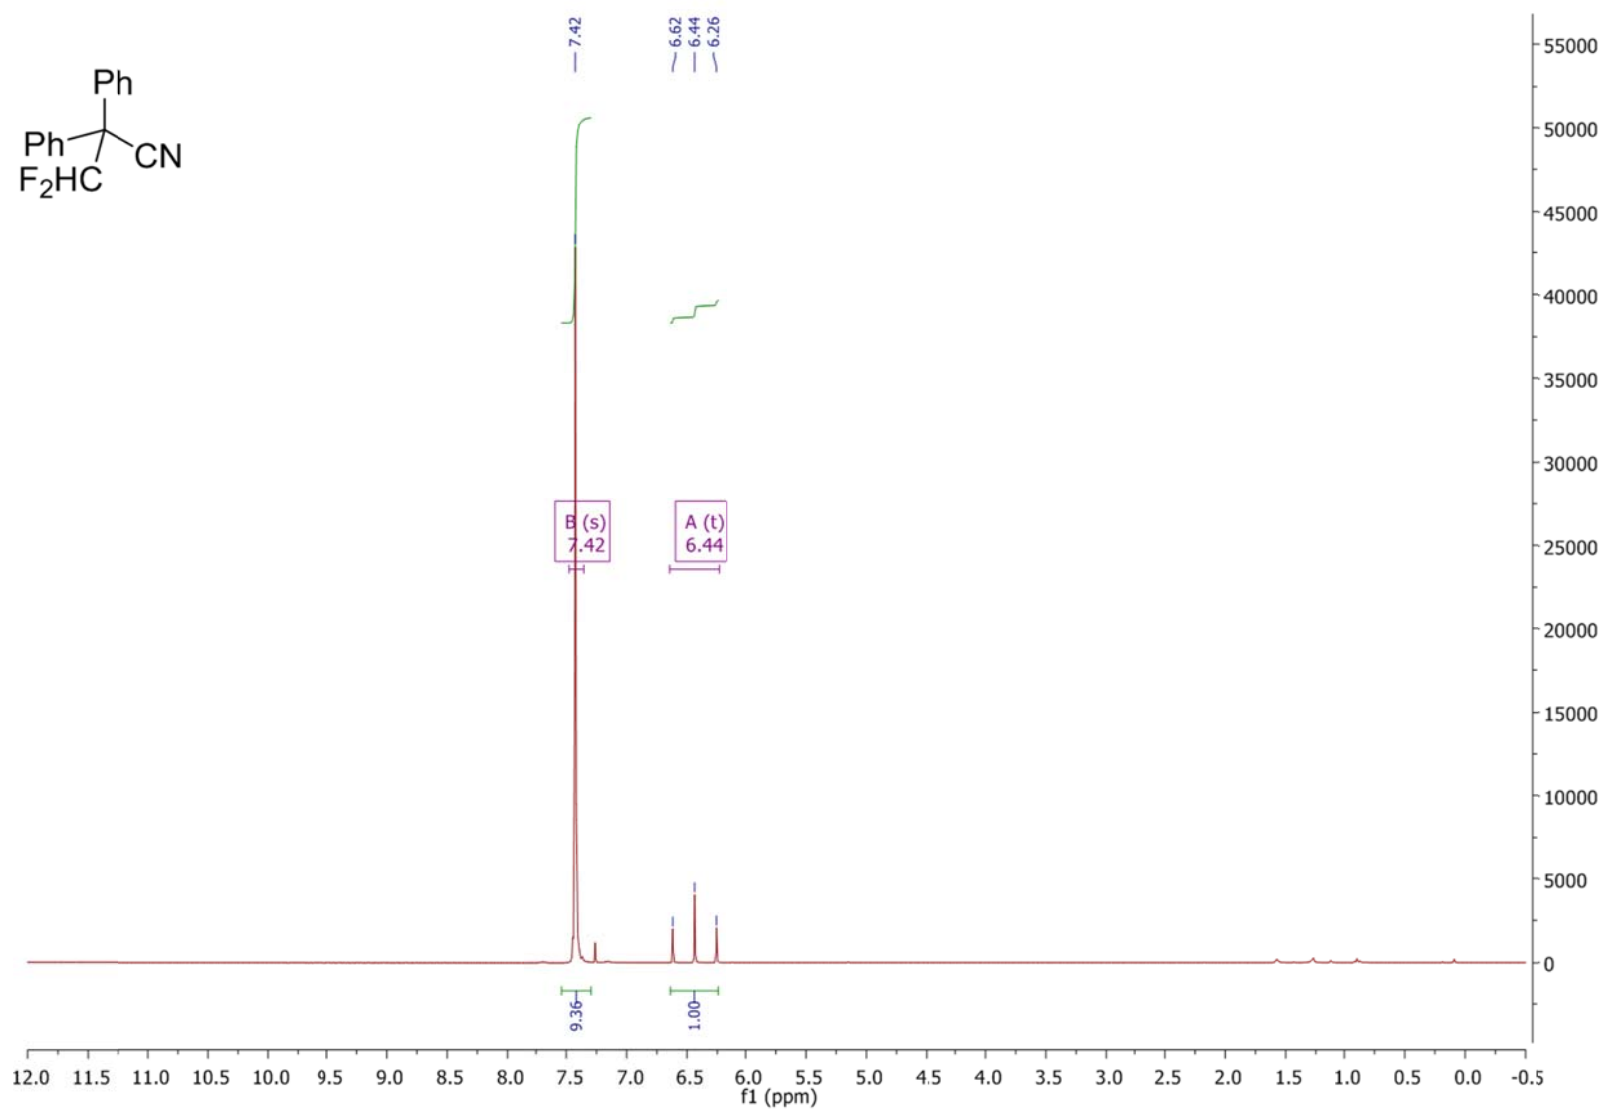



$^{13}\text{C}$ -NMR of difluoromethyldiphenylacetonitrile ( $\text{CDCl}_3$ )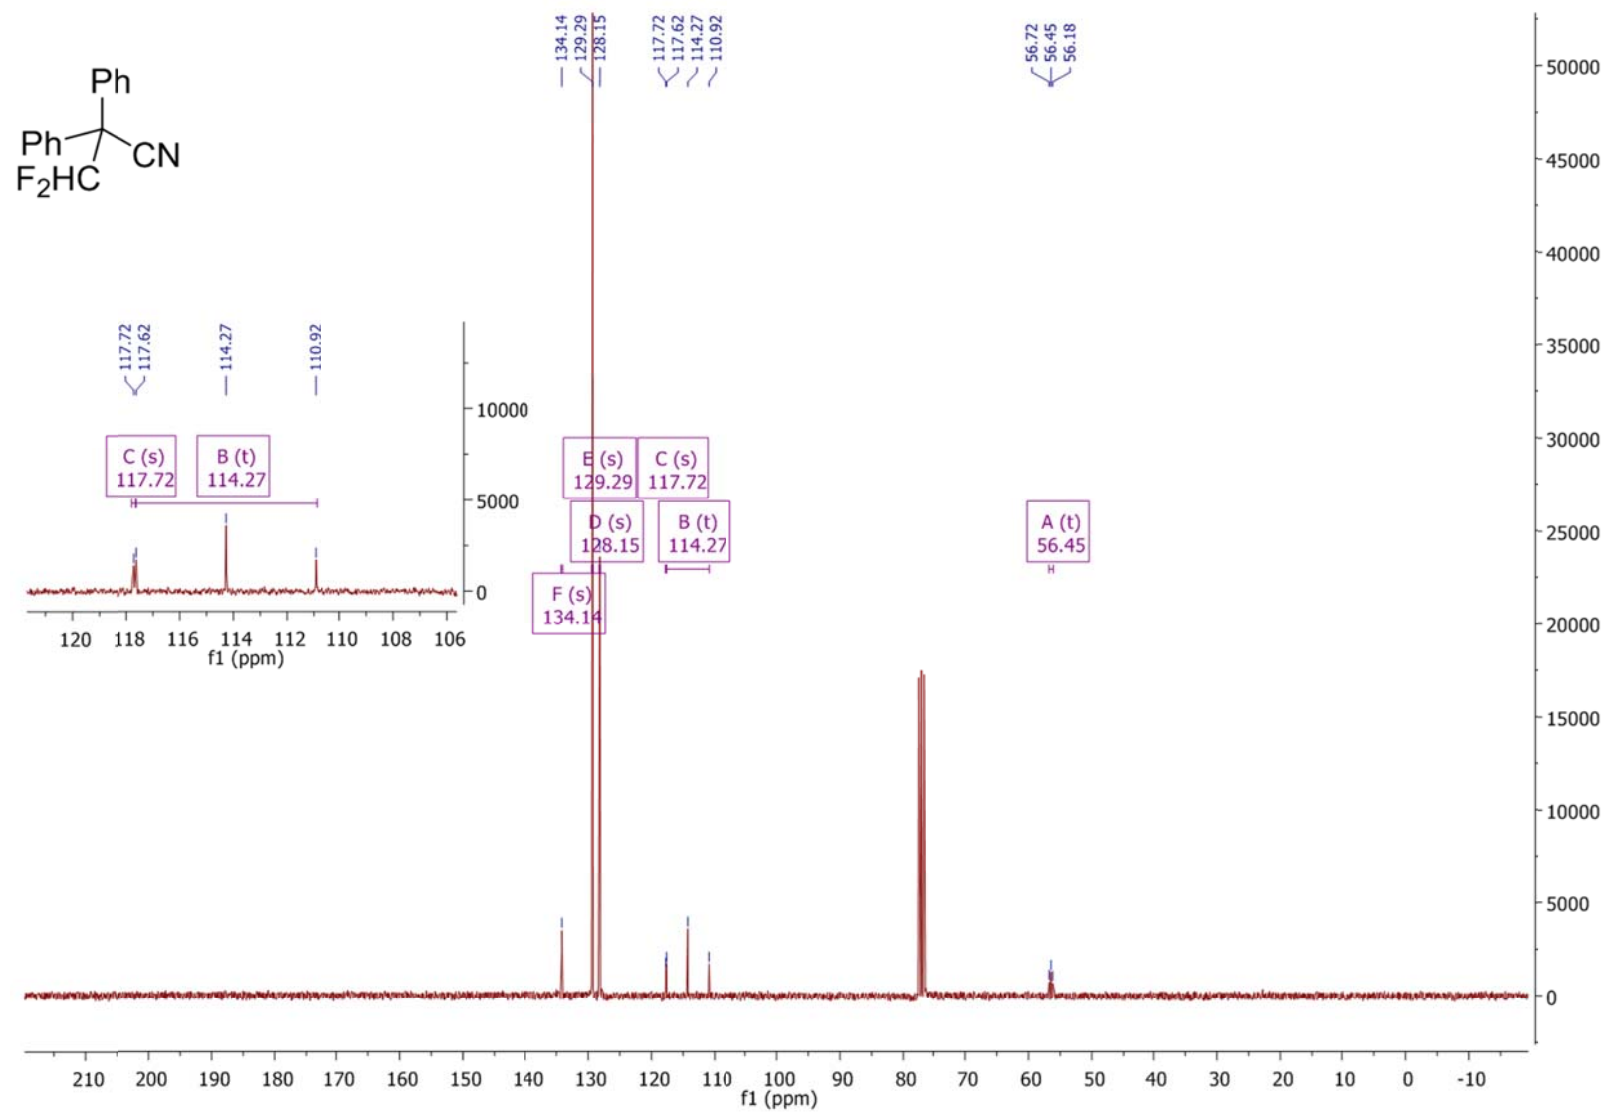

$^{19}\text{F}$ -NMR of difluoromethyldiphenylacetonitrile ( $\text{CDCl}_3$ )

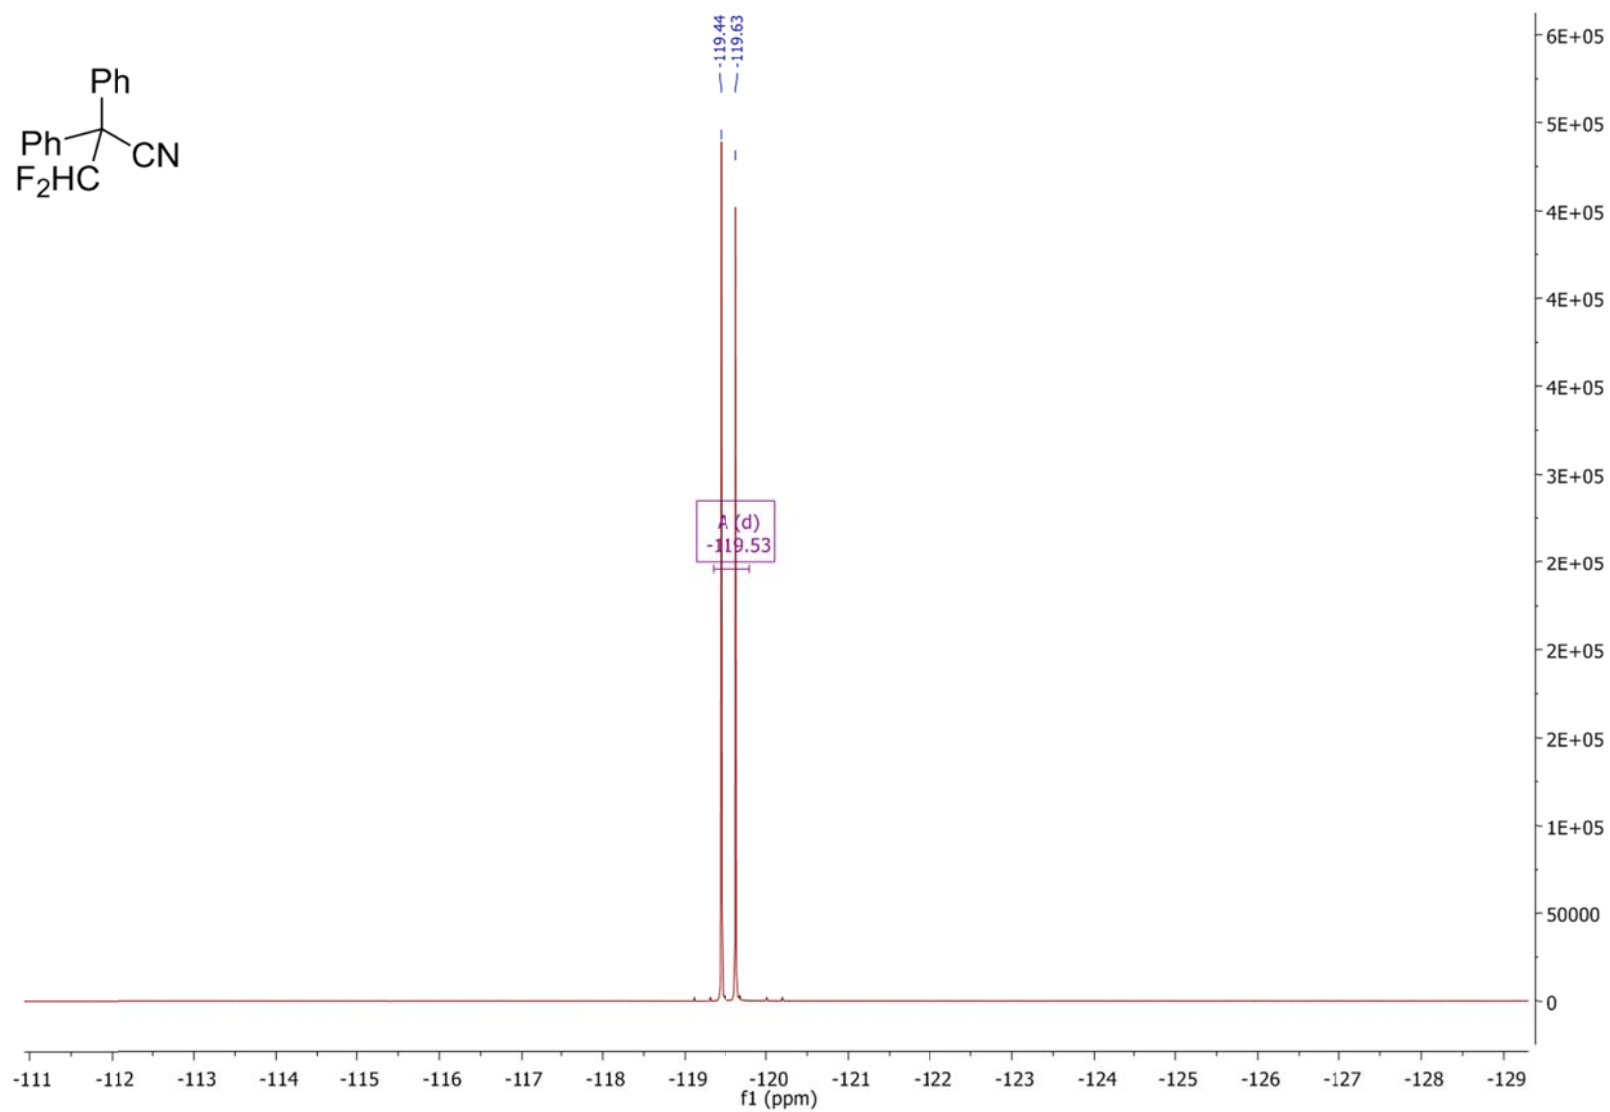

Supplement: c7re00176b1.pdf [file c7re00176b1.pdf]
